# Supplementary material for: Service Cancellation and Competitive Refund Policy
Source: Atypon-hosted journal article supplement (doi:10.1287/mksc.1080.0457), 2009-02-13
Supplement: mksc.1080.0457-sm-refundtechnical.pdf [file mksc.1080.0457-sm-refundtechnical.pdf]

## Technical Appendix for “Service Cancellation and Competitive Refund Policy”

I will show that any refund  $R_j \in [H, V_1 + H]$ ,  $j = A, B$ , will lead to the same equilibrium payoff for firm  $j$  as that when  $R_j = H$ , and any refund  $R_j < H$  is payoff equivalent to  $R_j = 0$ . To this end, I will analyze the scenarios when  $R_A \in [H, V_1 + H]$  and  $R_B \in [H, V_1 + H]$  and when  $R_A \in [H, V_1 + H]$  and  $R_B < H$ , corresponding to Section 3.1.2 and 3.1.3, respectively. The proof closely follows those for Proposition 1 and 2, respectively. Note first that allowing  $R_j$  to be greater than  $H$  does not change the equilibrium in the spot period nor the firms’ optimal reservation limit  $N_j$  in the advance period. I will then focus on investigating the equilibrium advance prices and the firms’ equilibrium expected profits. Moreover, note that the consumers’ gross expected valuation for a firm’s service (i.e., willingness to pay) in the advance period is given by  $V_1/2 + (R_j - H)/2 = (V_1 + R_j - H)/2$  when the firm offers  $R_j \in [H, V_1 + H]$ , and by  $V_1/2$  when  $R_j < H$ .

### Both Firms Offer Partial Refund: $R_A \in [H, V_1 + H]$ and $R_B \in [H, V_1 + H]$

In this scenario the firms’ optimal reservation limit is given by  $N_j^{**}$  as that in Lemma 2. Consider first  $(1 - \alpha)M/2 < N \leq (2 - \alpha)M/4$ . In this case, we have  $N_A^{**} + N_B^{**} \leq \alpha M$  and thus the firms are local monopolies in the advance period. It follows that in equilibrium  $P_{1A}^{**} = (V_1 + R_A - H)/2$  and  $P_{1B}^{**} = (V_1 + R_B - H)/2$ , while  $\Pi_A^{**} = \Pi_B^{**} = N_j^{**}(P_{1j}^{**} - R_j/2) + (1 - \alpha)MV_2/2 = [2N - (1 - \alpha)M](V_1 - H)/2 + (1 - \alpha)MV_2/2$ .

Consider then  $(2 - \alpha)M/4 < N < M/2$ . In this case, the equilibrium is in mixed strategy. When  $(V_1 + R_A - H)/2 - P_{1A} > (V_1 + R_B - H)/2 - P_{1B}$  or equivalently  $R_A/2 - P_{1A} > R_B/2 - P_{1B}$ , firm  $A$  will sell  $N_A^{**}$  and firm  $B$  will sell  $\alpha M - N_A^{**} = M - 2N$  in the advance period. Conversely, when  $(V_1 + R_A - H)/2 - P_{1A} < (V_1 + R_B - H)/2 - P_{1B}$  or equivalently  $R_A/2 - P_{1A} < R_B/2 - P_{1B}$ , firm  $A$  will sell  $\alpha M - N_B^{**} = M - 2N$  and firm  $B$  will sell  $N_B^{**}$  in the advance period. As a result, the lowest advance price a firm would like to charge is given by, respectively:

$$(\underline{P}_A - R_A/2)[2N - (1 - \alpha)M] = (M - 2N)(V_1 - H)/2 \implies \underline{P}_A^{**} = \frac{R_A}{2} + \frac{(M - 2N)(V_1 - H)/2}{2N - (1 - \alpha)M},$$

and

$$(\underline{P}_B - R_B/2)[2N - (1 - \alpha)M] = (M - 2N)(V_1 - H)/2 \implies \underline{P}_B^{**} = \frac{R_B}{2} + \frac{(M - 2N)(V_1 - H)/2}{2N - (1 - \alpha)M}.$$

Note that  $R_A/2 - \underline{P}_A^{**} = R_B/2 - \underline{P}_B^{**}$ . Therefore, the equilibrium support for the firms' advance prices is  $P_{1A}^{**} \in [\underline{P}_A^{**}, (V_1 + R_A - H)/2]$  and  $P_{1B}^{**} \in [\underline{P}_B^{**}, (V_1 + R_B - H)/2]$ , respectively. Nevertheless, the firms' equilibrium expected payoffs are  $\Pi_A^{**} = \Pi_B^{**} = (N - N_j^{**})(V_1 - H)/2 + (1 - \alpha)MV_2/2$ . It is then evident that the firms' equilibrium expected profits are the same as that in (7).

**Asymmetric Refund Policies:  $R_A \in [H, V_1 + H]$  and  $R_B < H$**

In this scenario the firms' optimal reservation limit is given by  $N_A^o$  and  $N_B^o$ , respectively, as in Section 3.1.3. Consider first  $(1 - \alpha)M/2 < N \leq (3 - \alpha)M/6$ . In this case, we have  $N_A^o + N_B^o \leq \alpha M$  and thus the firms remain local monopolies in the advance period. It is then straightforward that in equilibrium  $P_{1A}^o = (V_1 + R_A - H)/2$  and  $P_{1B}^o = V_1/2$ , and the firms' equilibrium expected payoffs are the same as those in Section 3.1.3.

Consider then the mixed-strategy equilibrium when  $(3 - \alpha)M/6 < N < M/2$ . In this case, when  $(V_1 + R_A - H)/2 - P_{1A} > V_1/2 - P_{1B}$  or equivalently  $(R_A - H)/2 > P_{1A} - P_{1B}$ , firm  $A$  will sell  $N_A^o$  and firm  $B$  will sell  $\alpha M - N_A^o = M - 2N$  in the advance period. Conversely, when  $(V_1 + R_A - H)/2 - P_{1A} < V_1/2 - P_{1B}$  or equivalently  $(R_A - H)/2 < P_{1A} - P_{1B}$ , firm  $A$  will sell  $\alpha M - N_B^o = (1 + \alpha)M/2 - N$  and firm  $B$  will sell  $N_B^o$  in the advance period. As a result, the lowest advance price a firm would like to charge is given by, respectively:

$$(\underline{P}_A - R_A/2)[2N - (1 - \alpha)M] = [(1 + \alpha)M/2 - N](V_1 - H)/2 \implies \underline{P}_A^o = \frac{R_A}{2} + \frac{[(1 + \alpha)M/2 - N](V_1 - H)/2}{2N - (1 - \alpha)M},$$

and

$$\underline{P}_B[N - (1 - \alpha)M/2] = (M - 2N)V_1/2 \implies \underline{P}_B^o = \frac{(M - 2N)V_1/2}{N - (1 - \alpha)M/2}.$$

Note that  $(R_A - H)/2 < \underline{P}_A^o - \underline{P}_B^o$ . Therefore, the equilibrium support for the firms' advance prices is  $P_{1A}^{**} \in [\underline{P}_A^o, (V_1 + R_A - H)/2]$  and  $P_{1B}^{**} \in [\underline{P}_A^o - (R_A - H)/2, V_1/2]$ , respectively. Moreover, we can also see that the firms' equilibrium expected advance-period payoffs are given by  $\Pi_{1A}^o = [(1 + \alpha)M/2 - N](V_1 - H)/2$  and  $\Pi_{1B}^o = [\underline{P}_A^o - (R_A - H)/2][N - (1 - \alpha)M/2] = [(1 + \alpha)M - 2N]V_1/8 + [6N - (3 - \alpha)M]H/8$ . It follows that the firms' equilibrium expected profits are the same as those in (8) and (9), respectively. This completes the proof.
